# Supplementary material
Source: MDPI journal article supplement (https://www.mdpi.com/2077-1312/11/1/154)
Supplement: s1 [file s1]

**Table S1.** Abiotic descriptors of water quality in beakers during the experiment trial. During all the experiment and in all replicates of the three types of post larvae feeds, the NO<sub>2</sub> values remained under the threshold. Similarly, PO<sub>4</sub> concentrations were constantly ranging between low values. NO<sub>3</sub> concentrations varied considerably in all the replicates, reaching its maximum at the 30<sup>th</sup> day. NH<sub>4</sub> values varied all along the experiment within all the post larvae replicates corresponding to the different types of feeds given. However, the highest rate of NH<sub>4</sub> concentration was recorded in the replicate containing post larvae feeding on diet 6 (2.5 mg/L). pH values and temperature follow the normal fluctuations happening in the marine environment. According to these two descriptors (pH and temperature) a decrease in the dissolved oxygen concentration was observed along the experimental time in all the different tanks (Nd = Not detectable).

| Control Diet | Time (Days) | NO <sub>2</sub> (mg/L) | PO <sub>4</sub> (mg/L) | NH <sub>4</sub> (mg/L) | pH    | Salinity (ppt) | O <sub>2</sub> (mg/L) | T (C°) | NO <sub>3</sub> (mg/L) |
|--------------|-------------|------------------------|------------------------|------------------------|-------|----------------|-----------------------|--------|------------------------|
|              | 0           | Nd                     | -                      | -                      | -     | 38             | 5.18                  | 18     | -                      |
|              | 5           | Nd                     | Nd                     | 0.35                   | 8.045 | 39             | 5.245                 | 19.05  | -                      |
|              | 7           | Nd                     | 0.11                   | Nd                     | 7.86  | 40             | 5.17                  | 17.75  | -                      |
|              | 9           | Nd                     | -                      | -                      | 8.17  | 38             | 4.99                  | 16.9   | 5.56                   |
|              | 12          | -                      | -                      | -                      | 7.975 | 40             | 4.71                  | 17     | -                      |
|              | 14          | -                      | 0.2                    | 0.95                   | 7.92  | 40             | 4.4                   | 17.1   | -                      |
|              | 20          | Nd                     | Nd                     | 0.6                    | 8.06  | 37.5           | 4.47                  | 20.8   | -                      |
|              | 26          | -                      | Nd                     | Nd                     | 8.025 | 20             | 4.175                 | 18.95  | 5.46                   |
|              | 30          | Nd                     | Nd                     | 0.205                  | 8.005 | 37.5           | 4.07                  | 21.55  | 5.75                   |
|              | 40          | Nd                     | 0.025                  | 0.45                   | 8.015 | 40.5           | -                     | 22.95  | -                      |
|              | 57          | Nd                     | -                      | -                      | 7.94  | -              | 4                     | 21.95  | 5.76                   |
|              | 67          | Nd                     | 0.035                  | 0.8                    | 7.9   | 40             | 0                     | 20.45  | -                      |
|              | 76          | Nd                     | 0.07                   | 1.55                   | -     | 40             | 3.83                  | 21     | 0.5                    |
|              | 82          | Nd                     | -                      | 0.85                   | 7.815 | 41             | -                     | 21.65  | 0.5                    |
| Diet A       | Time (Days) | NO <sub>2</sub> (mg/L) | PO <sub>4</sub> (mg/L) | NH <sub>4</sub> (mg/L) | pH    | Salinity (ppt) | O <sub>2</sub> (mg/L) | T (C°) | NO <sub>3</sub> (mg/L) |
|              | 0           | Nd                     | -                      | -                      | -     | 38             | -                     | 18     | -                      |
|              | 5           | Nd                     | 0.07                   | 0.35                   | 8.02  | 37.5           | 5.25                  | 19.25  | -                      |
|              | 7           | Nd                     | 0.33                   | 1.7                    | 7.875 | 37.5           | 5.04                  | 18.75  | -                      |
|              | 9           | -                      | -                      | -                      | 8.115 | 38.5           | 5.02                  | 16.45  | 5.91                   |
|              | 12          | -                      | -                      | -                      | 7.925 | 39.5           | 5.15                  | 16.05  | -                      |
|              | 14          | Nd                     | 0.185                  | 0.06                   | 7.94  | 38             | 4.99                  | 17.6   | -                      |
|              | 20          | -                      | Nd                     | 1.05                   | 8.02  | 38             | 4.41                  | 20.5   | -                      |
|              | 26          | Nd                     | Nd                     | Nd                     | 7.93  | 20             | 4.42                  | 18.69  | 5.21                   |
|              | 30          | Nd                     | Nd                     | 0.5                    | 7.97  | 38             | 4.12                  | 21.9   | 6.65                   |
|              | 40          | Nd                     | Nd                     | 0.6                    | 7.99  | 40             | 4                     | 23.1   | -                      |
|              | 57          | Nd                     | -                      | -                      | 7.955 | -              | -                     | 21.5   | 5.65                   |
|              | 67          | Nd                     | 0.08                   | 0.35                   | 7.945 | 39.5           | 3.925                 | 20.45  | 5.75                   |
|              | 76          | Nd                     | Nd                     | 2.5                    | -     | 40             | -                     | 20.65  | 5.75                   |
|              | 82          | Nd                     | -                      | 0.5                    | 7.82  | 40.5           | 3.715                 | 22.35  | 5.2                    |
| Diet B       | Time (Days) | NO <sub>2</sub> (mg/L) | PO <sub>4</sub> (mg/L) | NH <sub>4</sub> (mg/L) | pH    | Salinity (ppt) | O <sub>2</sub>        | T (C°) | NO <sub>3</sub> (mg/L) |

|  |    |    |      |       |       |      |        |       |      |
|--|----|----|------|-------|-------|------|--------|-------|------|
|  |    |    |      |       |       |      | (mg/L) |       |      |
|  | 0  | Nd | -    | -     | -     | 38   |        | 18    | -    |
|  | 5  | Nd | Nd   | 0.3   | 7.98  | 18.5 | 5.01   | 19.5  | -    |
|  | 7  | Nd | 0.16 | 0.8   | 7.875 | 38   | 5.54   | 17.95 | -    |
|  | 9  | -  | -    | -     | 8.08  | 38   | 5.18   | 17.15 | 5.26 |
|  | 12 | -  | -    | -     | 7.95  | 39.5 | 5.35   | 16    | -    |
|  | 14 | Nd | 0.15 | 0.5   | 7.945 | 39.5 | 5.09   | 16.75 | -    |
|  | 20 | -  | Nd   | 0.51  | 8.045 | 37.5 | 0      | 20.42 | -    |
|  | 26 | Nd | Nd   | 0.9   | -     | 40   | 0      | 18.43 | 4.55 |
|  | 30 | Nd | Nd   | 0.065 | 8.02  | 38.5 | 0      | 21.5  | 7.5  |
|  | 40 | Nd | Nd   | 0.5   | 4     | 20   | 0      | 23    | -    |
|  | 57 | Nd | -    | -     | 7.99  | -    | -      | 21.5  | 6.05 |
|  | 67 | Nd | 0.05 | 0.07  | 7.975 | 38.5 | 3.84   | 20.45 | 5.5  |
|  | 76 | -  | 0.03 | 0.25  | -     | 22   | 0      | 21.25 | 3.5  |
|  | 82 | Nd | -    | 0.95  | 7.81  | 40   | 3.73   | 22.3  | 4    |

### **Correlation Matrices for diets during the third feeding experimental trial.**

The correlation matrix between the different abiotic variables measured as well as the post larvae number in the replicates of post larvae feeding on control diet illustrate that:

- NO<sub>3</sub> has a positive correlation with both pH and O<sub>2</sub> Concentration as well as a strong correlation (p= 0.98) with the number of post larvae;
- PO<sub>4</sub> has a moderate positive correlation with the salinity, yet very low positive correlation with the post larvae number (P=0.029);
- NH<sub>4</sub> concentrations has a moderate positive correlation with pH, low positive correlation with the temperature and post larvae number and a negligible positive correlation with O<sub>2</sub> (p=0.01);
- pH has a strong positive correlation with NO<sub>3</sub> (p=0.711), and moderate positive correlation with post larvae number (0.53), less strong correlation with NH<sub>4</sub> concentration (p=0.46) and with O<sub>2</sub> (p=0.36);
- O<sub>2</sub> has a high positive correlation with post larvae number (p=0.84) as well as for NO<sub>3</sub> concentration (p=0.76) and a moderate positive correlation with pH (p=0.36);
- Salinity has a positive correlation with pH and temperature.
- Post larvae number has a very strong correlation with both NO<sub>3</sub> (p=0.98) and O<sub>2</sub> (p=0.84), moderate positive correlation with pH values, low positive correlation with NH<sub>4</sub> (p=0.18) and PO<sub>4</sub> (p=0.029).

**Table S2.** Correlation matrix for abiotic and biotic measures from replicates of Control diet.

|                           | <b>NO<sub>3</sub></b> | <b>PO<sub>4</sub></b> | <b>NH<sub>4</sub></b> | <b>pH</b> | <b>O<sub>2</sub></b> | <b>Salinity</b> | <b>Temperature</b> |
|---------------------------|-----------------------|-----------------------|-----------------------|-----------|----------------------|-----------------|--------------------|
| <b>NO<sub>3</sub></b>     |                       |                       |                       |           |                      |                 |                    |
| <b>PO<sub>4</sub></b>     | -0.9990               |                       |                       |           |                      |                 |                    |
| <b>NH<sub>4</sub></b>     | -0.8999               | -0.3046               |                       |           |                      |                 |                    |
| <b>pH</b>                 | 0.7118                | -0.3959               | 0.4686                |           |                      |                 |                    |
| <b>O<sub>2</sub></b>      | 0.7647                | 0.0017                | 0.0108                | 0.3649    |                      |                 |                    |
| <b>Salinity</b>           | -0.5199               | 0.4194                | -0.0028               | -0.0762   | -0.0333              |                 |                    |
| <b>Temperature</b>        | -0.3646               | -0.0856               | 0.1278                | -0.1685   | -0.8287              | 0.1070          |                    |
| <b>Post-larvae number</b> | 0.9810                | 0.0294                | 0.1826                | 0.5334    | 0.8496               | -0.1616         | -0.5871            |

**Diet A:**

The correlation matrix between the different abiotic variables measured as well as the post larvae number in the repost replicates of post larvae feeding on diet A illustrate that:

- NO<sub>2</sub> concentration has a strong positive correlation with NH<sub>4</sub> (p=0.91) and PO<sub>4</sub> (p=0.84), moderate positive correlation with O<sub>2</sub> (p=0.41) and post larvae number (p=0.25);
- NO<sub>3</sub> has a strong positive correlation with pH (p=0.82) and moderate positive correlation with post larvae number (p=0.39), Temperature (p=0.32), O<sub>2</sub> (p=0.31) and salinity (p=0.24);
- PO<sub>4</sub> has a remarkable positive correlation with O<sub>2</sub> (p=0.63) and post larvae number (p=0.44), yet lower positive correlation with both Salinity and NH<sub>4</sub> (p=0.16 and p=0.15 for the latter);
- NH<sub>4</sub> has a positive correlation with pH, salinity, NO<sub>2</sub> and NO<sub>3</sub>;
- pH has a positive correlation with Temperature and almost negligible correlation with post larvae number;
- O<sub>2</sub> has a very high positive correlation with post larvae number (p=0.94) and moderate positive correlations with NO<sub>2</sub>, NO<sub>3</sub> and PO<sub>4</sub> concentrations;
- Post larvae has a high positive correlation with O<sub>2</sub> concentration (p=0.94), moderate positive correlations with PO<sub>4</sub> (p=0.44), NO<sub>3</sub> (p=0.39) and NO<sub>2</sub> (p=0.25);

**Table S3.** Correlation matrix for abiotic and biotic measures from replicates of Diet A.

|                           | <b>NO<sub>2</sub></b> | <b>NO<sub>3</sub></b> | <b>PO<sub>4</sub></b> | <b>NH<sub>4</sub></b> | <b>pH</b>   | <b>O<sub>2</sub></b> | <b>Salinity</b> | <b>Temperature</b> |
|---------------------------|-----------------------|-----------------------|-----------------------|-----------------------|-------------|----------------------|-----------------|--------------------|
| <b>PO<sub>4</sub></b>     | 0.8402                | -<br>0.4337           |                       |                       |             |                      |                 |                    |
| <b>NH<sub>4</sub></b>     | 0.9157                | -<br>0.1807           | 0.1541                |                       |             |                      |                 |                    |
| <b>pH</b>                 | -<br>0.1249           | 0.8242                | -<br>0.4309           | 0.2243                |             |                      |                 |                    |
| <b>O<sub>2</sub></b>      | 0.4199                | 0.3163                | 0.6357                | -<br>0.1525           | -<br>0.2492 |                      |                 |                    |
| <b>Salinity</b>           | 0.0562                | 0.2471                | 0.1666                | 0.3583                | 0.0865      | -<br>0.0898          |                 |                    |
| <b>Temperature</b>        | -<br>0.2182           | 0.3275                | -<br>0.4936           | -<br>0.3462           | 0.2571      | -<br>0.3302          | -0.4993         |                    |
| <b>Post larvae number</b> | 0.2596                | 0.3961                | 0.4415                | -<br>0.2194           | 0.0144      | 0.9477               | -0.1627         | -0.1929            |

**Diet B**

The correlation matrix between the different abiotic variables measured as well as the post larvae number in the post larva replicates of post larvae feeding on diet B illustrate that:

- NO<sub>2</sub> has a high positive correlation with NO<sub>3</sub> concentration, pH (p=0.66) and moderate positive correlation with both temperature and salinity;
- NO<sub>3</sub> has a considerable positive correlation with pH (p=0.69), moderate positive correlation with post larvae number, and less important positive correlation with O<sub>2</sub> (p=0.32) and temperature (p=0.21);
- PO<sub>4</sub> has a high positive correlation with O<sub>2</sub> (p=0.6), yet low positive correlation with NH<sub>4</sub> (p=0.28), Salinity (p=0.27) and post larvae number (p=0.16);
- NH<sub>4</sub> has a positive correlation with O<sub>2</sub> and salinity (p=0.23 for both) and PO<sub>4</sub> (p=0.28);
- pH has a high positive correlation with NO<sub>2</sub> and NO<sub>3</sub> (p=0.66 and p=0.69 for the latter) yet a lower positive correlation with Temperature (p=0.23) and post larvae number (p=0.24);
- O<sub>2</sub> has a very high positive correlation with post larvae number (p=0.82) and a moderate positive correlation with salinity (p=0.44);
- Salinity has a moderate positive correlation with post larvae number (p=0.4);

- Post larvae number has a high positive correlation with O<sub>2</sub> concentration (p=0.82), moderate positive correlation with NO<sub>3</sub> (p=0.48) and salinity (p=0.4), and a low positive correlation with pH (p=0.24) and PO<sub>4</sub> (p=0.16).

**Table S4.** Correlation matrix for different abiotic and biotic measures from replicates of diet B.

|                    | NO <sub>2</sub> | NO <sub>3</sub> | PO <sub>4</sub> | NH <sub>4</sub> | pH      | O <sub>2</sub> | Salinity | Temperature |
|--------------------|-----------------|-----------------|-----------------|-----------------|---------|----------------|----------|-------------|
| NO <sub>3</sub>    | 0.8187          |                 |                 |                 |         |                |          |             |
| PO <sub>4</sub>    | -<br>0.3144     | -<br>0.7337     |                 |                 |         |                |          |             |
| NH <sub>4</sub>    | -<br>0.5120     | -<br>0.3173     | 0.2814          |                 |         |                |          |             |
| pH                 | 0.6614          | 0.6999          | -<br>0.3743     | -0.2396         |         |                |          |             |
| O <sub>2</sub>     | -<br>0.1339     | 0.3223          | 0.6006          | 0.2353          | -0.1538 |                |          |             |
| Salinity           | 0.1122          | -<br>0.1075     | 0.2773          | 0.2311          | 0.07127 | 0.4488         |          |             |
| Temperature        | 0.3852          | 0.2122          | -<br>0.7218     | -<br>0.19764    | 0.2334  | -<br>0.8607    | -0.5387  |             |
| Post larvae number | -<br>0.0552     | 0.4858          | 0.1629          | -0.0788         | 0.2424  | 0.8286         | 0.4009   | -0.6934     |

**Table S5.** D'Agostino & Pearson normality test on number of *P. lividus* post-larvae feeding on Control diet (*U. rigida*), and diet A (*U. rigida*, SHG® microperte, Algamac enrich) and diet B (*U. rigida*, 2% Spirulina SHG®).

| D'Agostino & Pearson normality test | Control Diet | Diet A | Diet B |
|-------------------------------------|--------------|--------|--------|
| K2                                  | 4,632        | 2,124  | 2,241  |
| P value                             | 0,0987       | 0,3458 | 0,3261 |
| Passed normality test (alpha=0.05)? | Yes          | Yes    | Yes    |

**Table S6.** Average values of biotic data corresponding to the different replicates of post-larvae feeding on Control Diet, Diet A, and Diet B.

| Diet Type   | Control |          |           | Diet A  |          |           | Diet B  |          |           |
|-------------|---------|----------|-----------|---------|----------|-----------|---------|----------|-----------|
| Time (Days) | Nbr. PL | Movement | Mortality | Nbr. PL | Movement | Mortality | Nbr. PL | Movement | Mortality |
| 0           | 20      | 3        | 0%        | 20      | 3        | 0%        | 20      | 3        | 0%        |
| 5           | 19      | 2.5      | 5%        | 19      | 3        | 5%        | 19      | 3        | 5%        |
| 7           | 19      | 1.5      | 5%        | 16.5    | 1.5      | 18%       | 18.5    | 1.5      | 8%        |
| 9           | 17      | 1.5      | 15%       | 16.5    | 1.5      | 18%       | 18      | 1        | 10%       |
| 12          | 17      | 2.5      | 15%       | 16      | 2        | 20%       | 18      | 3        | 10%       |
| 14          | 17      | 2        | 15%       | 16      | 1.5      | 20%       | 18      | 3        | 10%       |
| 20          | 16      | 2        | 20%       | 15.5    | 1.5      | 23%       | 18      | 3        | 10%       |
| 26          | 15      | 2.5      | 25%       | 13.5    | 3        | 33%       | 18      | 3        | 10%       |
| 30          | 15      | 2.5      | 25%       | 11      | 3        | 45%       | 18      | 3        | 10%       |
| 40          | 13.5    | 1.5      | 33%       | 10      | 3        | 50%       | 14.5    | 2.5      | 28%       |
| 57          | 13.5    | 1.5      | 33%       | 10      | 2.5      | 50%       | 14.5    | 2.5      | 28%       |
| 67          | 8       | 1        | 60%       | 7.5     | 1.5      | 63%       | 14      | 2.5      | 30%       |
| 76          | 3.5     | 0        | 83%       | 6.5     | 1        | 68%       | 13.5    | 1.5      | 33%       |
| 82          | 2.5     | 0        | 88%       | 6       | 2        | 70%       | 11      | 2        | 45%       |

**Table S7.** D'Agostino & Pearson normality test on post-larvae of *P. lividus* movement scores on Control diet (*U. rigida*), and diet A (*U. rigida*, SHG® microperle, Algamac enrich) and diet B (*U. rigida*, 2% Spirulina SHG®).

|                                     |        |        |        |
|-------------------------------------|--------|--------|--------|
| D'Agostino & Pearson normality test |        |        |        |
| K2                                  | 2,913  | 7,206  | 4,173  |
| P value                             | 0,2330 | 0,0272 | 0,1241 |
| Passed normality test (alpha=0.05)? | Yes    | No     | Yes    |
